# Supplementary material for: The preparation of NiO/Ni–N/C nanocomposites and its electrocatalytic performance for methanol oxidation reaction
Source: Royal Society of Chemistry journal article supplement (doi:10.1039/d0nj02045a), 2020-01-01
Supplement: d0nj02045a1.pdf [file d0nj02045a1.pdf]

Supplementary information for

The preparation of NiO/Ni-N/C nanocomposites and its electrocatalytic performance  
for methanol oxidation reaction

Jingchuang Zhao<sup>a</sup>, Yingzhen Zhang<sup>a</sup>, Xianyu Kang<sup>a</sup>, Yancai Li<sup>a,b,\*</sup>

<sup>a</sup> College of Chemistry, Chemical Engineering and Environment, Minnan Normal  
University, Zhangzhou 363000, P. R. China

<sup>b</sup> Fujian Province Key Laboratory of Modern Analytical Science and Separation  
Technology, Minnan Normal University, Zhangzhou 363000, P. R. China

\* Corresponding author

Corresponding E-mail: liyancai@mnnu.edu.cn

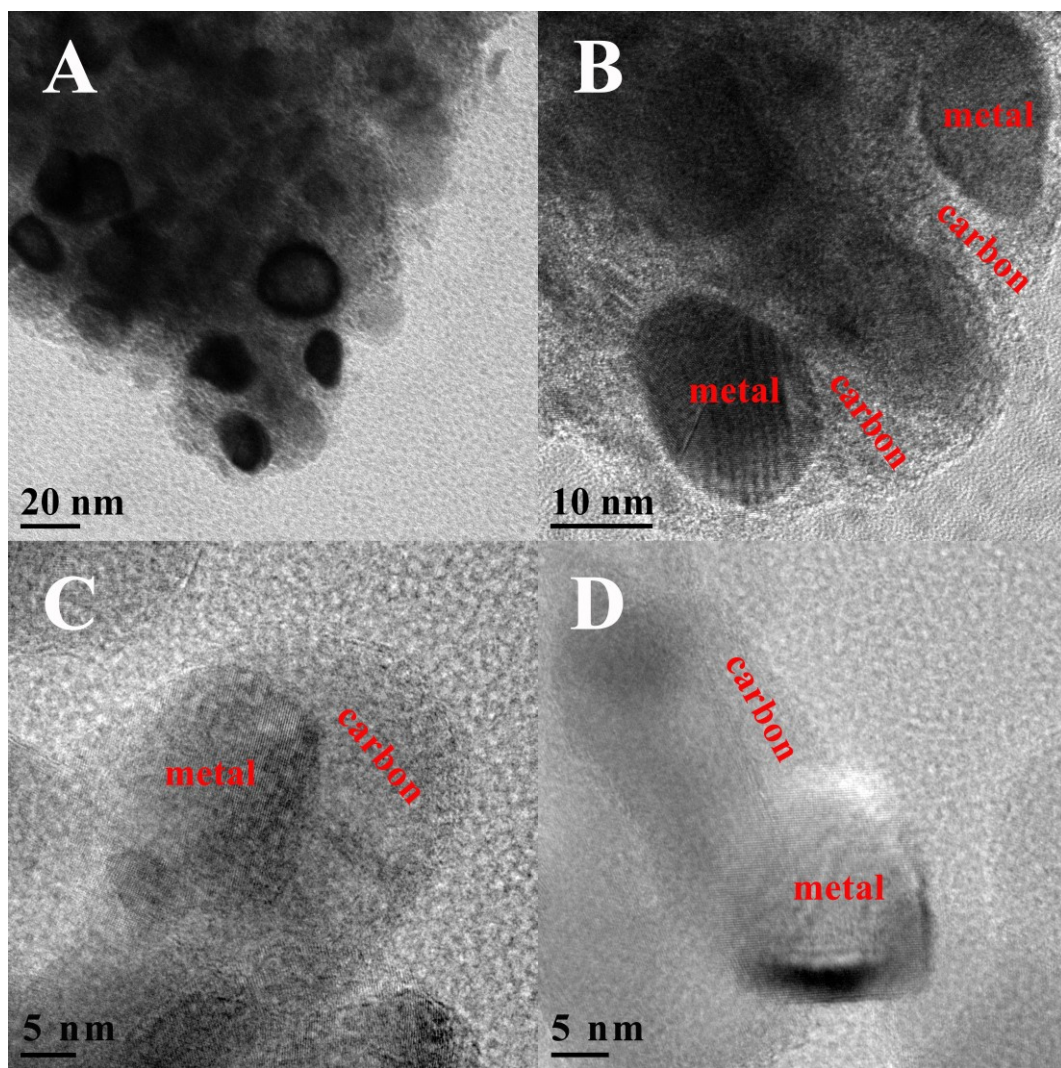

**Fig. S1** (A-D) TEM images of the NiO/Ni-N/C<sub>500</sub> nanocomposites

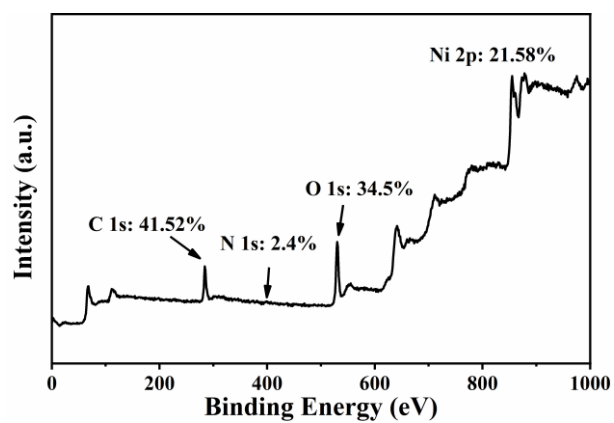

**Fig. S2** XPS survey spectra of the NiO/Ni-N/C<sub>500</sub> nanocomposites

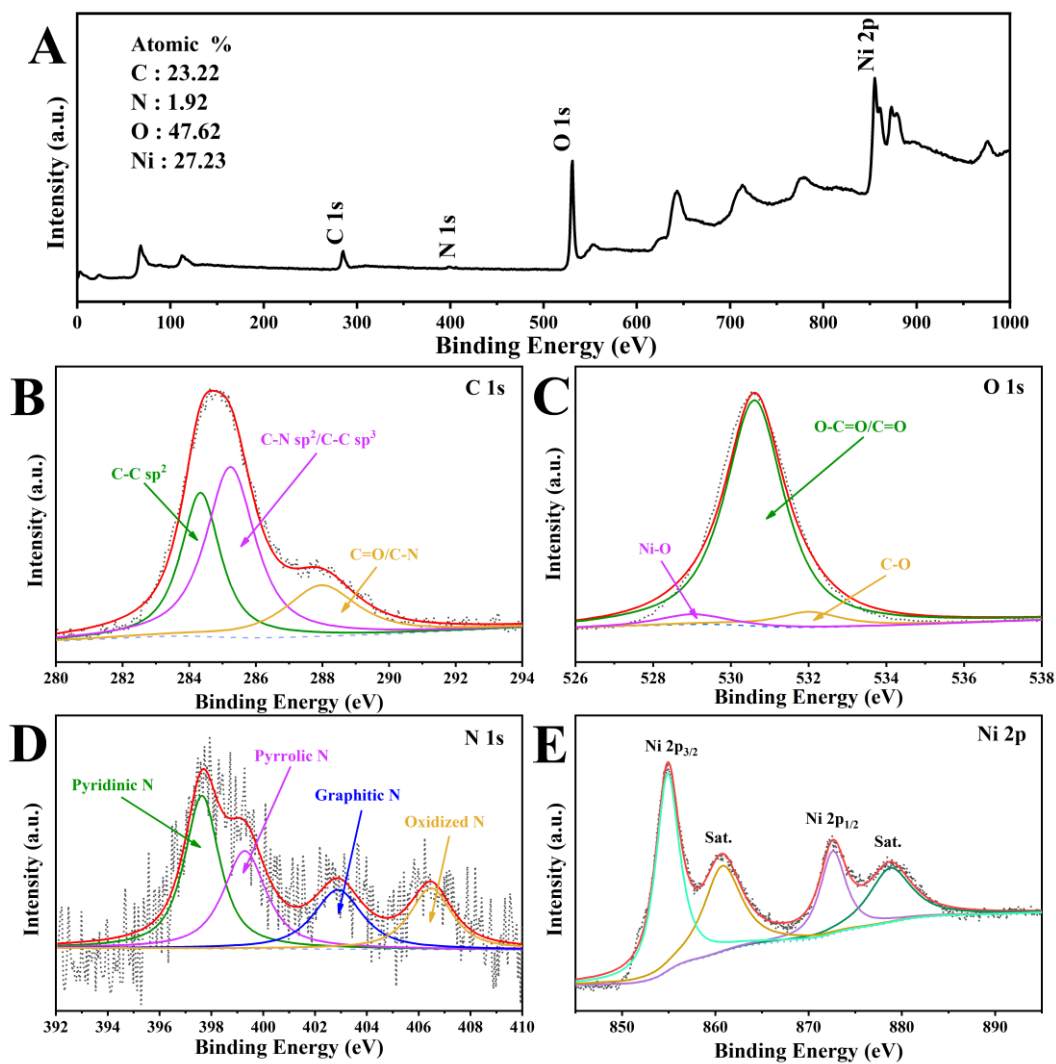

**Fig. S3** XPS survey spectra of (A) C 1s (B), O 1s (C), N 1s (D) and Ni 2p (E) of the Ni(OH)<sub>2</sub>/N-C nanocomposites (The contents of C, N, O and Ni elements on the catalyst surface were approximately equal to 23.22, 1.92, 47.62 and 27.23 atom %, respectively.)

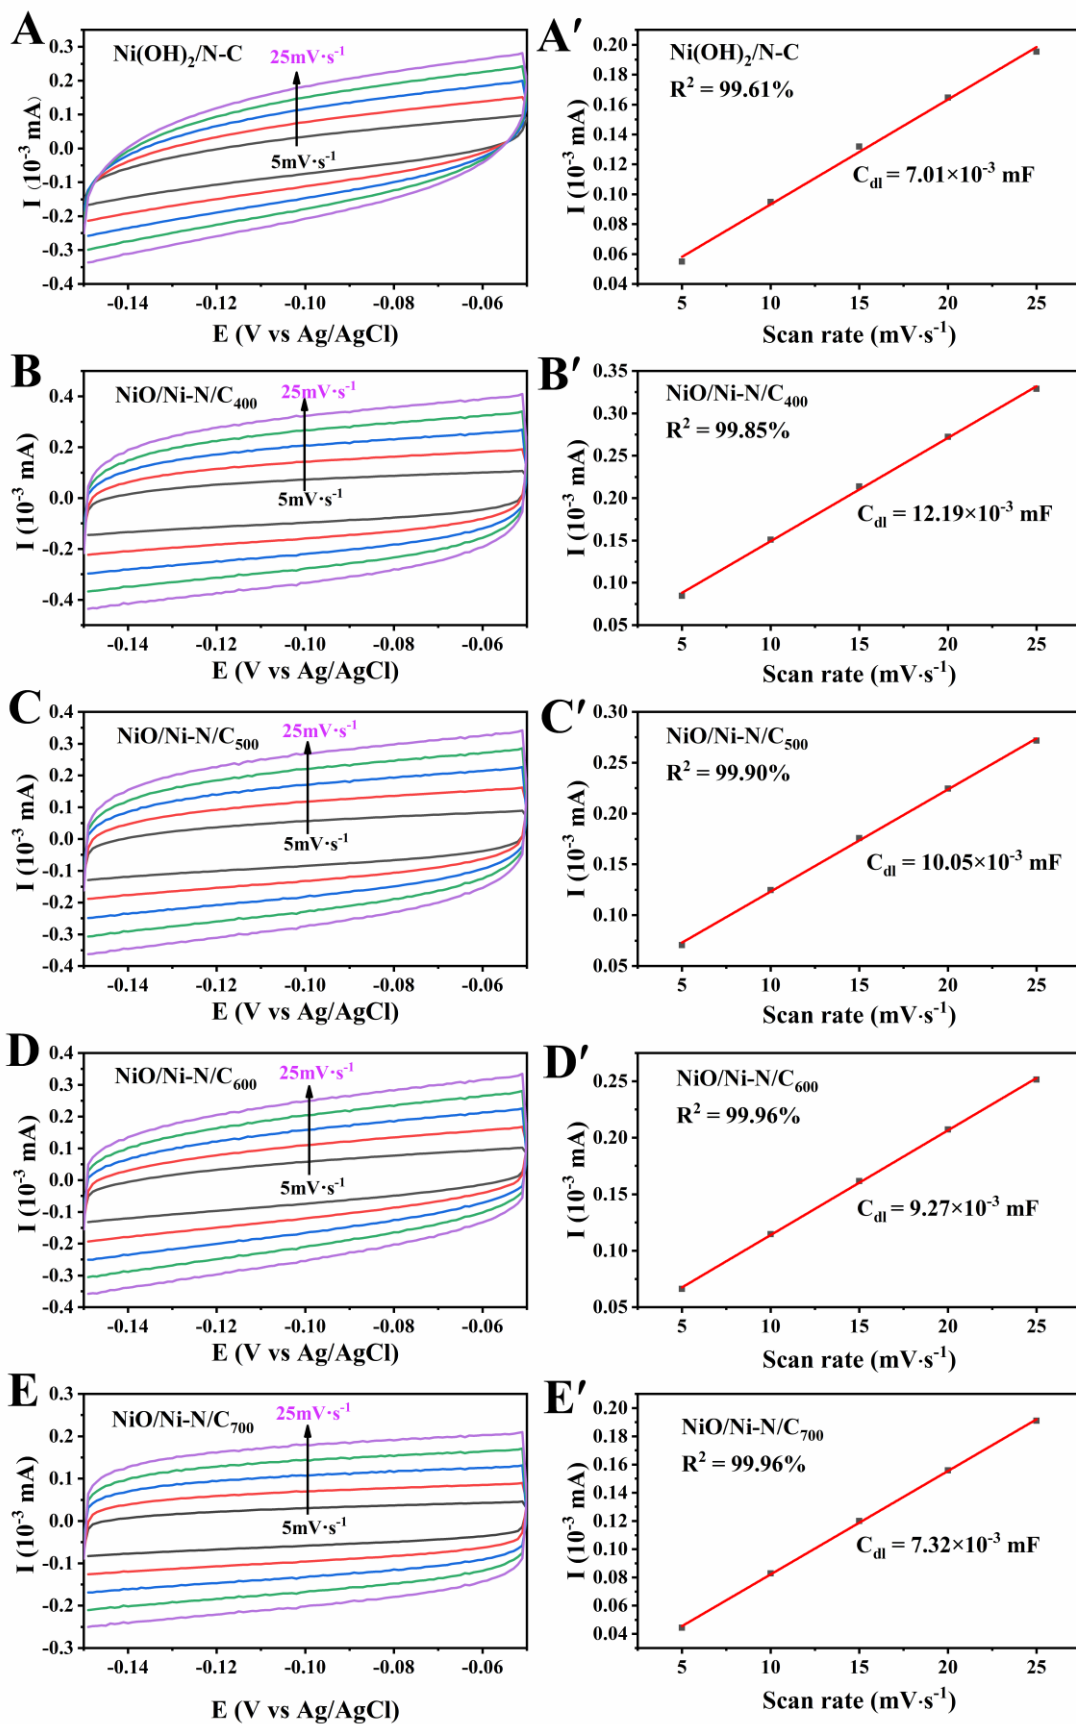

Fig. S4 CV curves of (A) the Ni(OH)<sub>2</sub>/N-C, (B) the NiO/Ni-N/C<sub>400</sub>, (C) the NiO/Ni-N/C<sub>500</sub>, (D)

the NiO/Ni-N/C<sub>600</sub> and (E) the NiO/Ni-N/C<sub>700</sub> from -0.15 V to -0.05 V vs Ag/AgCl at scan rates of 5, 10, 15, 20 and 25 mV·s<sup>-1</sup> in 1.0 M KOH. The capacitive current  $((I_a - I_c)/2)$  at -0.1 V vs Ag/AgCl as a function of various scan rates for (A') the Ni(OH)<sub>2</sub>/N-C, (B') the NiO/Ni-N/C<sub>400</sub>, (C') the NiO/Ni-N/C<sub>500</sub>, (D') the NiO/Ni-N/C<sub>600</sub> and (E') the NiO/Ni-N/C<sub>700</sub>; the C<sub>dl</sub> equal to the slopes

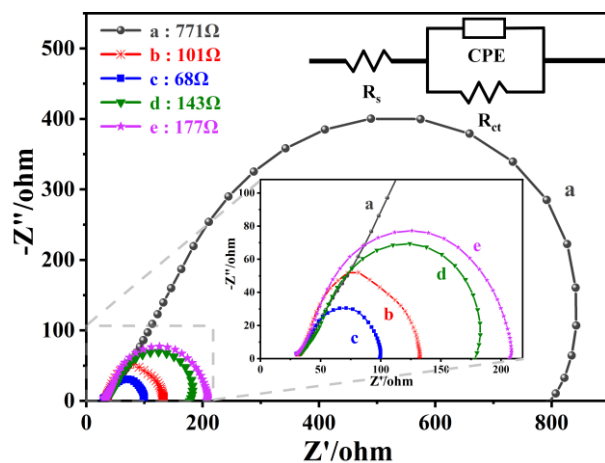

**Fig. S5** Nyquist plots of (a) the Ni(OH)<sub>2</sub>/N-C/GCE, (b) the NiO/Ni-N/C<sub>400</sub>/GCE, (c) the NiO/Ni-N/C<sub>500</sub>/GCE, (d) the NiO/Ni-N/C<sub>600</sub>/GCE and (e) the NiO/Ni-N/C<sub>700</sub>/GCE in 1.0 M KOH containing 3.0 M CH<sub>3</sub>OH. Insets show the equivalent circuit and zoom in view of the Nyquist plot in Z' range of 0 – 220 Ω

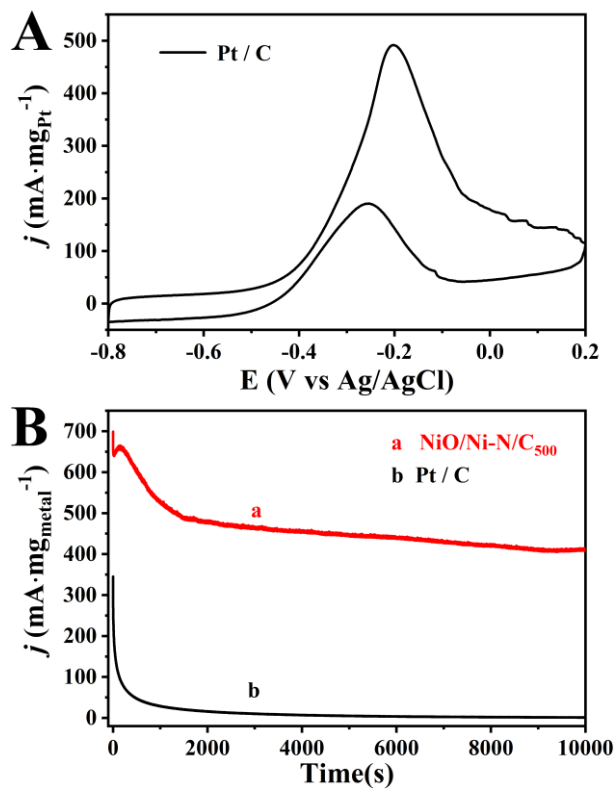

**Fig. S6** (A) CV curve of the Pt/C/GCE, scan rate:  $50 \text{ mV s}^{-1}$ ; (B) I-t curves for 10000s of the NiO/Ni-N/C<sub>500</sub>/GCE (0.6 V vs Ag/AgCl) (a) and the Pt/C/GCE (-0.2V vs Ag/AgCl) (b). All tests were performed at 1.0 M KOH containing 3.0 M CH<sub>3</sub>OH



**Table S1** Comparison of mass activity between non-precious metal catalysts in this study and reported catalysts for MOR

| Catalyst                  | Specific activity<br>mA·cm <sup>-2</sup> | Mass activity<br>mA·mg <sup>-1</sup> | CH <sub>3</sub> OH concentration<br>mol·L <sup>-1</sup> | Scanning rate<br>mV·s <sup>-1</sup> | Ref.      |
|---------------------------|------------------------------------------|--------------------------------------|---------------------------------------------------------|-------------------------------------|-----------|
| Ni/CN                     | 12                                       | 57                                   | 3                                                       | 50                                  | [1]       |
| Ni-Cu/CN                  | 1.6                                      | 5.6                                  | 3                                                       | 50                                  | [1]       |
| NiMoO <sub>4</sub> /C     | 49                                       | ~16.3                                | 2                                                       | 50                                  | [2]       |
| Cu/NiCuNWs-220/C          | 34.9                                     | 867.1*                               | 1                                                       | 50                                  | [3]       |
| Ni-Cu-P/C                 | 9.5                                      | –                                    | 0.5                                                     | 10                                  | [4]       |
| Meso NiPO NS              | 44.97 <sup>#</sup>                       | 636                                  | 0.5                                                     | 50                                  | [5]       |
| Ni/rGO                    | –                                        | 1600                                 | 1                                                       | 50                                  | [6]       |
| CuO/Co(OH) <sub>2</sub>   | 159                                      | 764                                  | 3                                                       | 50                                  | [7]       |
| NiP/rGO                   | 16.4                                     | 117                                  | 0.5                                                     | 10                                  | [8]       |
| Pt/C                      | –                                        | 492*                                 | 3                                                       | 50                                  | This work |
| Ni(OH) <sub>2</sub> /N-C  | 5.71                                     | 373*                                 | 3                                                       | 50                                  | This work |
| NiO/Ni-N/C <sub>400</sub> | 9.5                                      | 700*                                 | 3                                                       | 50                                  | This work |
| NiO/Ni-N/C <sub>600</sub> | 11.39                                    | 535*                                 | 3                                                       | 50                                  | This work |
| NiO/Ni-N/C <sub>700</sub> | 14.7                                     | 545*                                 | 3                                                       | 50                                  | This work |
| NiO/Ni-N/C <sub>500</sub> | 18.47                                    | 1043*                                | 3                                                       | 50                                  | This work |

<sup>#</sup> (normalized by the geometric area of the electrode)

\* (normalized by metal)

## References

- [1] I.S. Pieta, A. Rathi, P. Pieta, R. Nowakowski, M. Hołdyski, M. Pisarek, A. Kaminska, M.B. Gawande, R. Zboril, *Applied Catalysis B: Environmental*, 2019, 244, 272-283.
- [2] P.R. Jothi, S. Kannan, V. G, *Journal of Power Sources*, 2015, 277, 350-359.
- [3] D. Wu, W. Zhang, D. Cheng, *ACS Appl Mater Interfaces*, 2017, 9, 19843-19851.
- [4] R.M.A. Hameed, K.M. El-Khatib, *International Journal of Hydrogen Energy*, 2010, 35, 2517-2529.
- [5] X. Song, Q. Sun, L. Gao, W. Chen, Y. Wu, Y. Li, L. Mao, J.-H. Yang, *International Journal of Hydrogen Energy*, 2018, 43, 12091-12102.
- [6] H. Sun, Y. Ye, J. Liu, Z. Tian, Y. Cai, P. Li, C. Liang, *Chem Commun (Camb)*, 2018, 54, 1563-1566.
- [7] L. Chen, Z. Hua, J. Shi, M. He, *ACS Appl Mater Interfaces*, 2018, 10, 39002-39008.
- [8] H. Zhang, C.-D. Gu, M.-L. Huang, X.-L. Wang, J.-P. Tu, *Electrochemistry Communications*, 2013, 35, 108-111.
